# Supplementary material for: Structure Elucidation and in Vitro Toxicity of New Azaspiracids Isolated from the Marine Dinoflagellate Azadinium poporum
Source: MDPI journal article supplement (doi:10.3390/md13116687), 2015-10-30
Supplement: s1 [file s1]

**Supplementary Information**


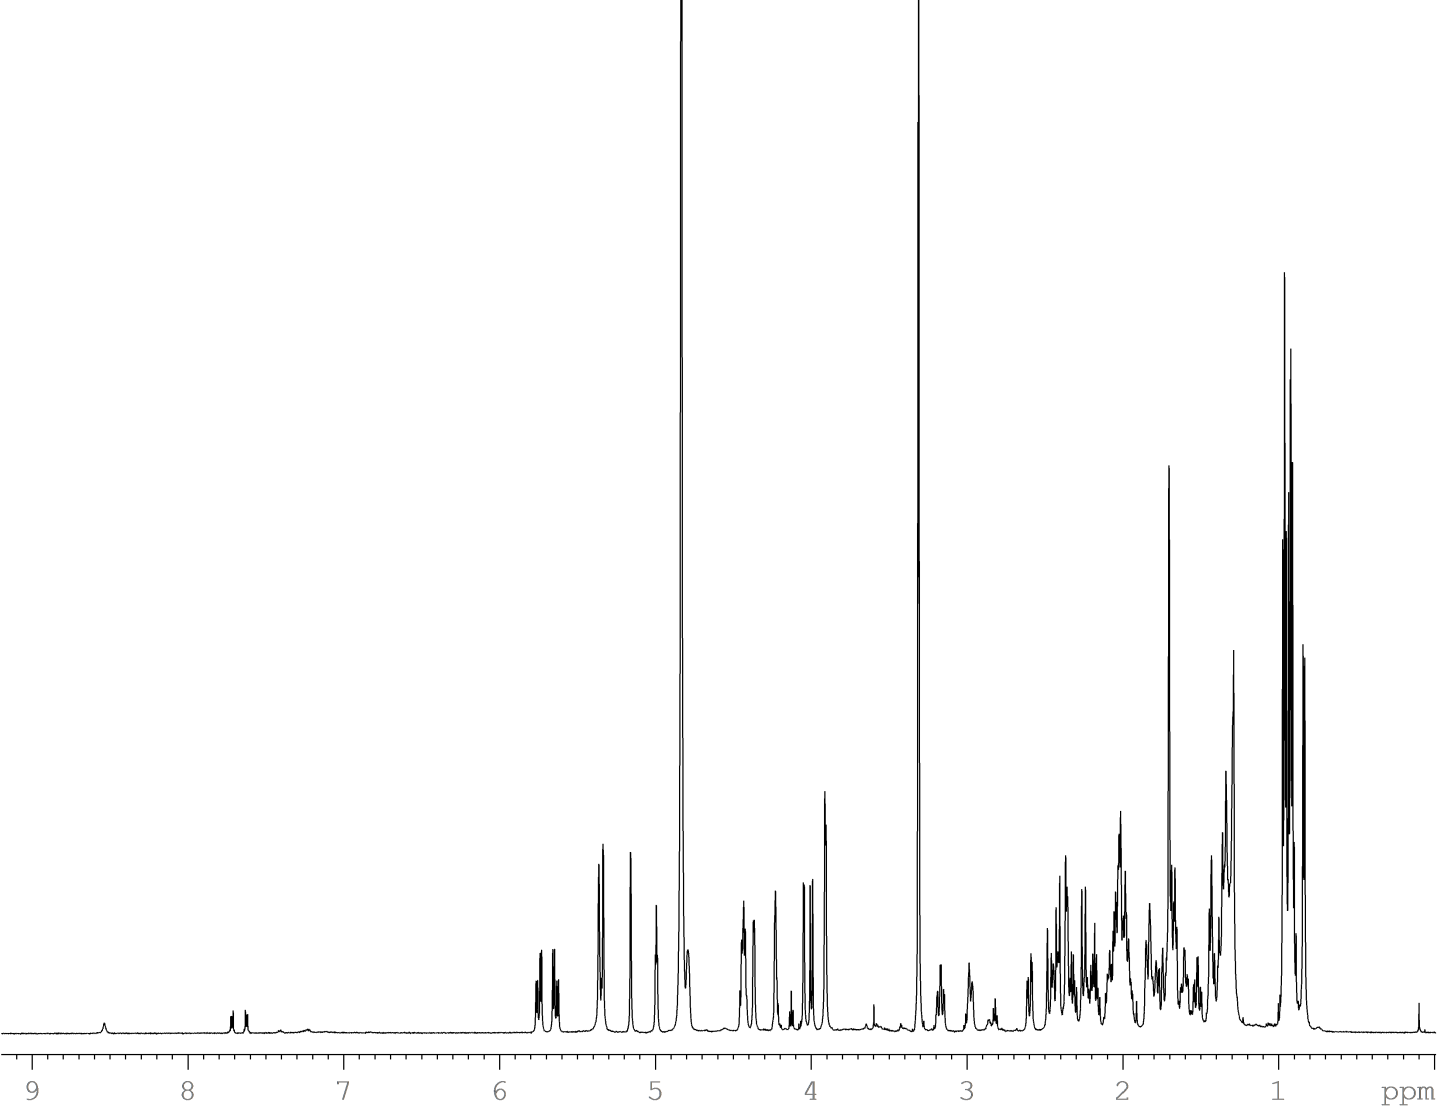


**Figure S1.** 1D 1H-NMR spectrum of AZA-36 (**1**) in CD3OD, 303 K, 600 MHz.


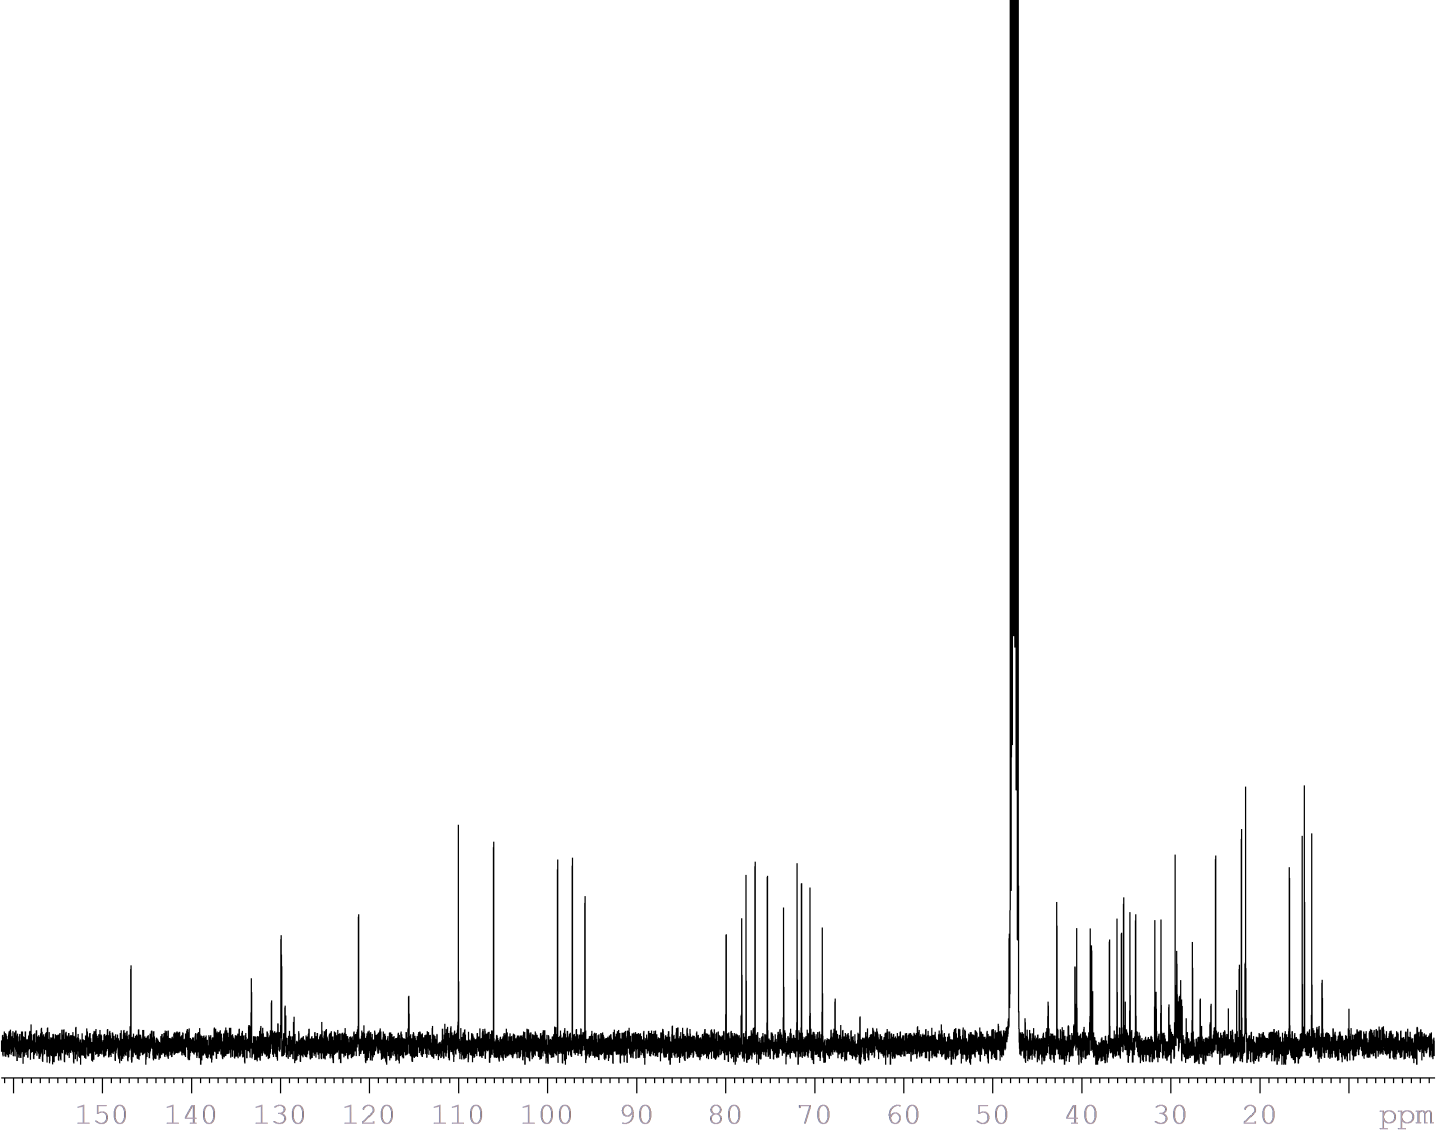


**Figure S2.** 1D 13C-NMR spectrum of AZA-36 (**1**) in CD3OD, 303 K, 150 MHz.


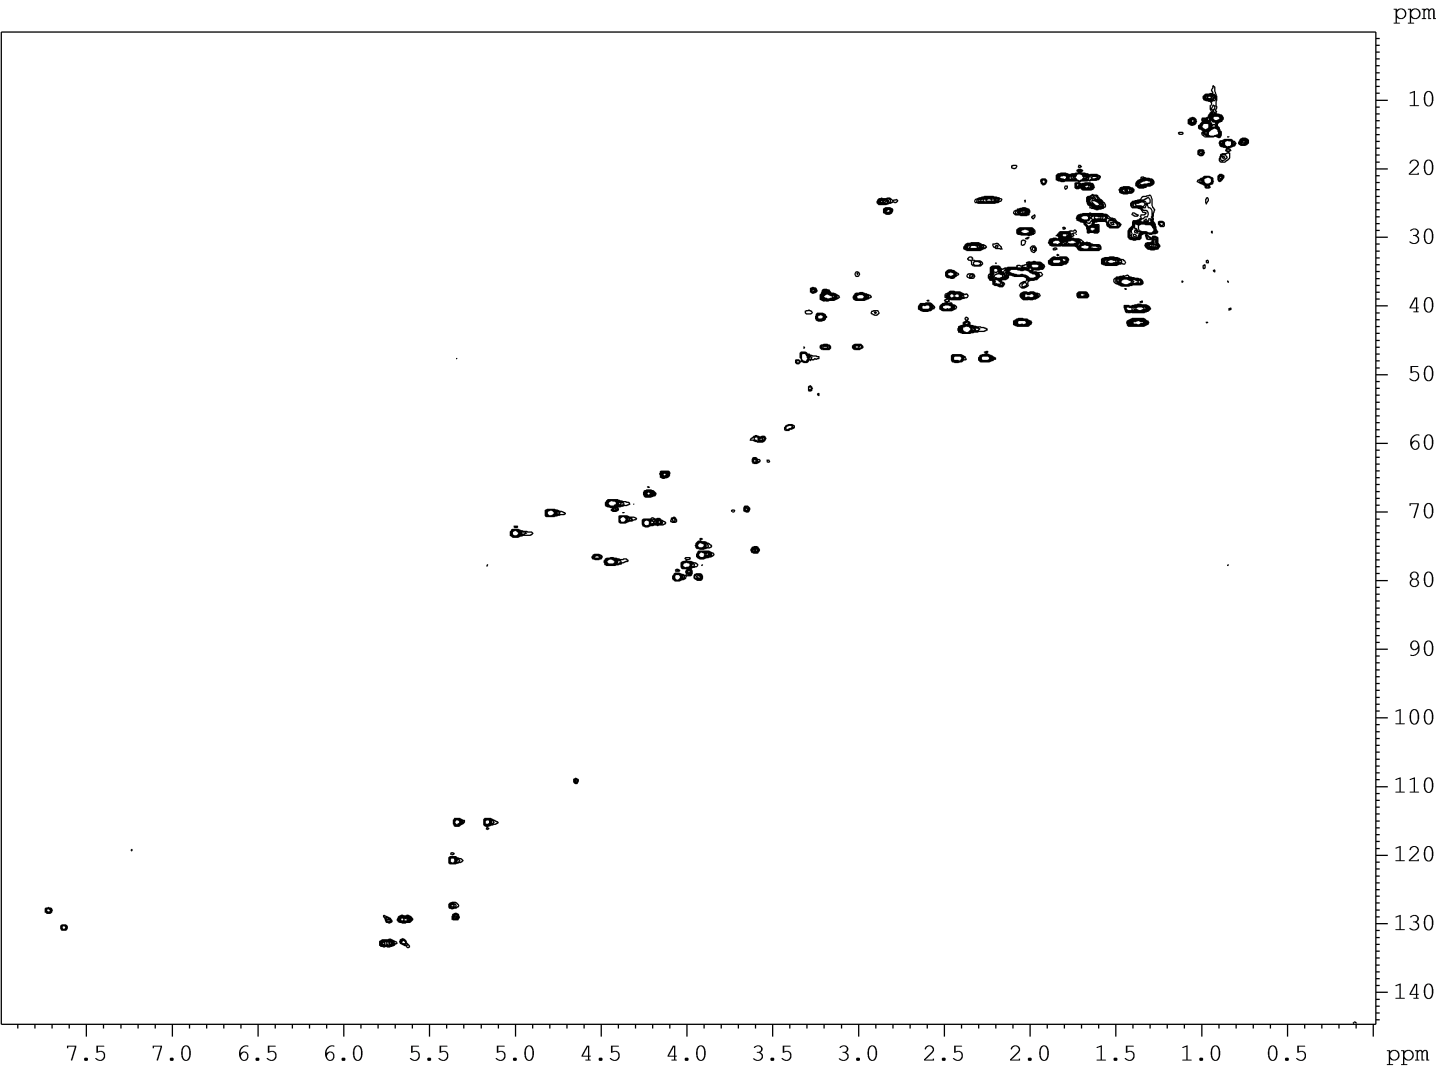


**Figure S3.** 2D1H,13C-HSQC spectrum of AZA-36 (**1**) in CD3OD, 303 K.


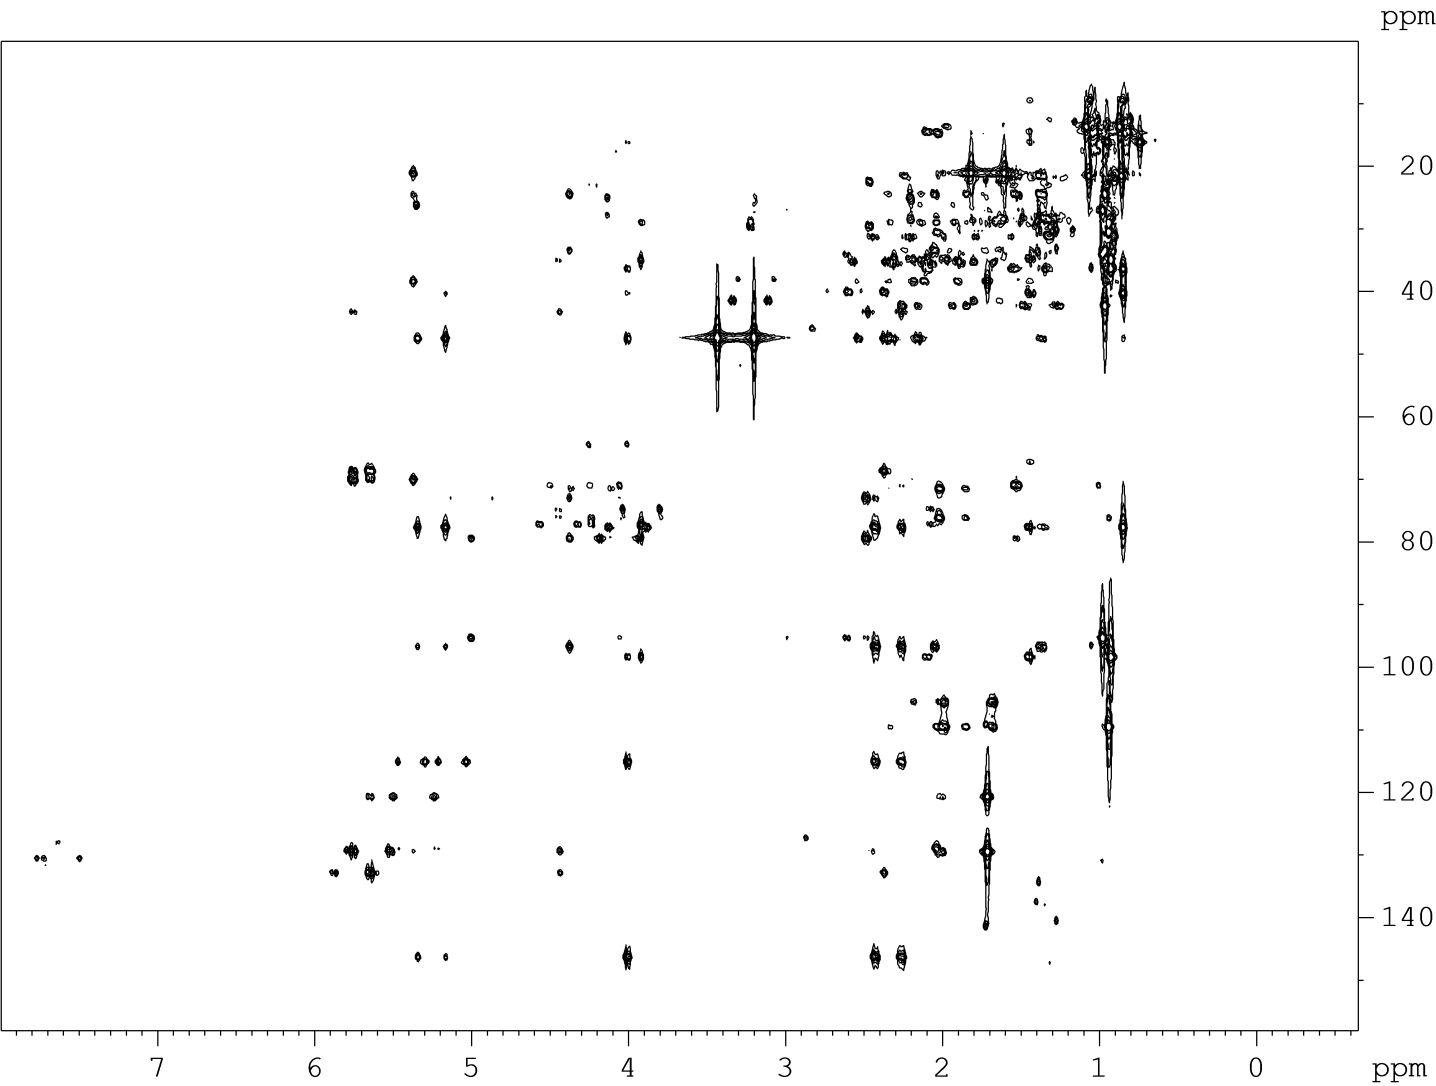


**Figure S4.** 2D1H,13C-HMBC spectrum of AZA-36 (**1**) in CD3OD, 303 K.


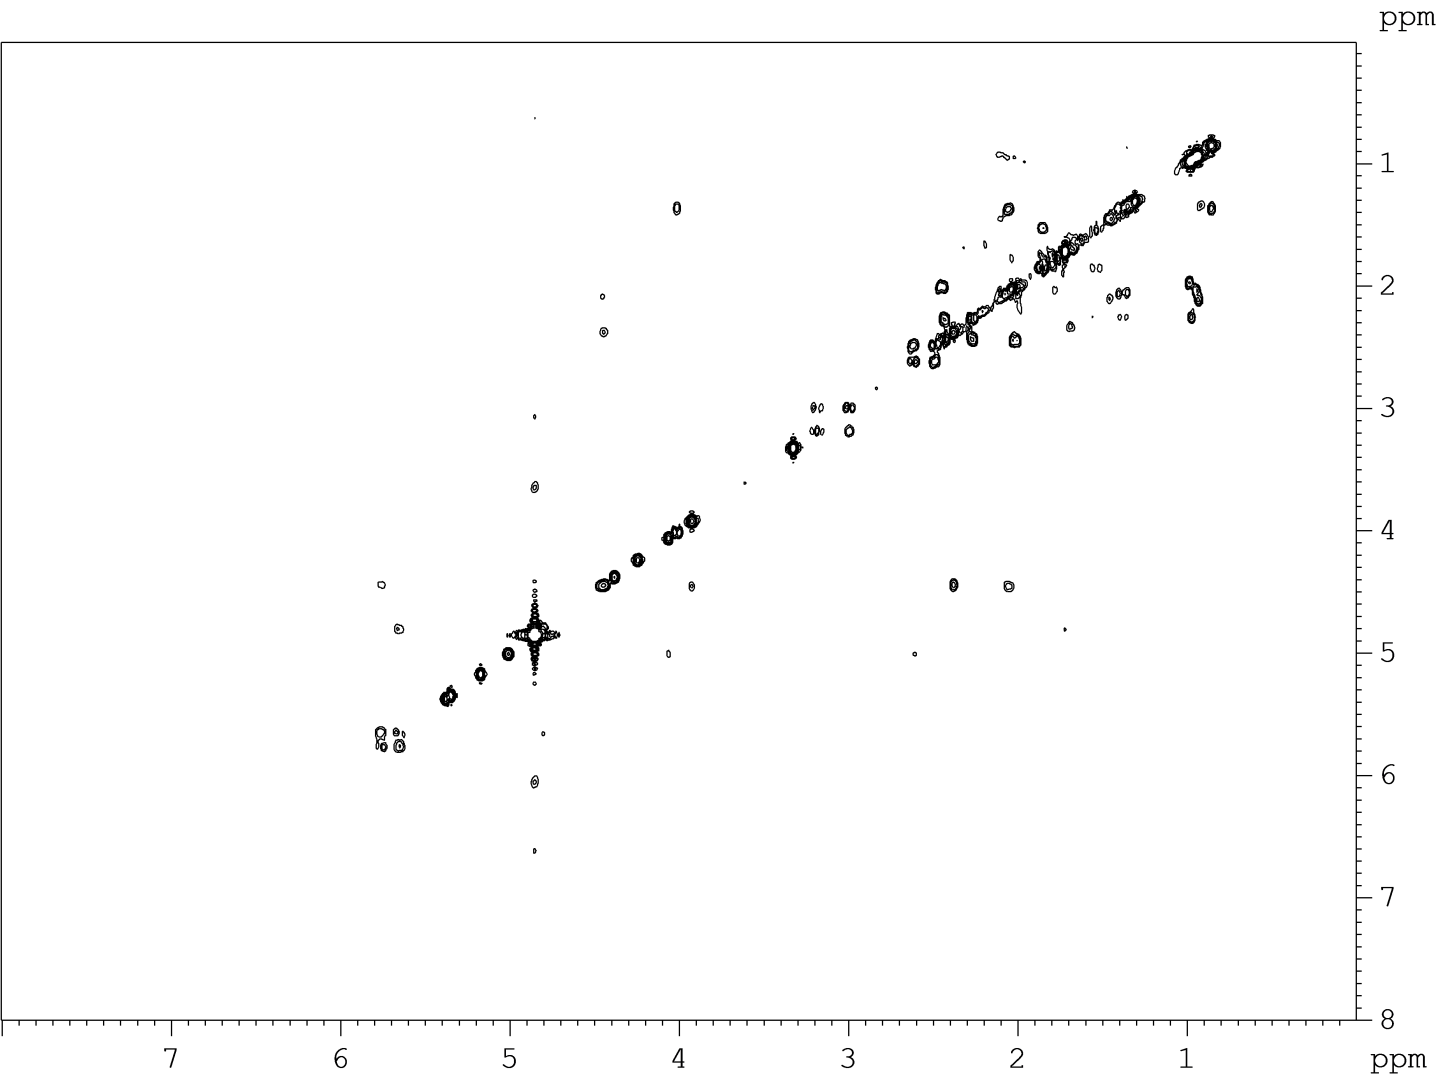


**Figure S5.** 2D1H,1H-COSY spectrum of AZA-36 (**1**) in CD3OD, 303 K.


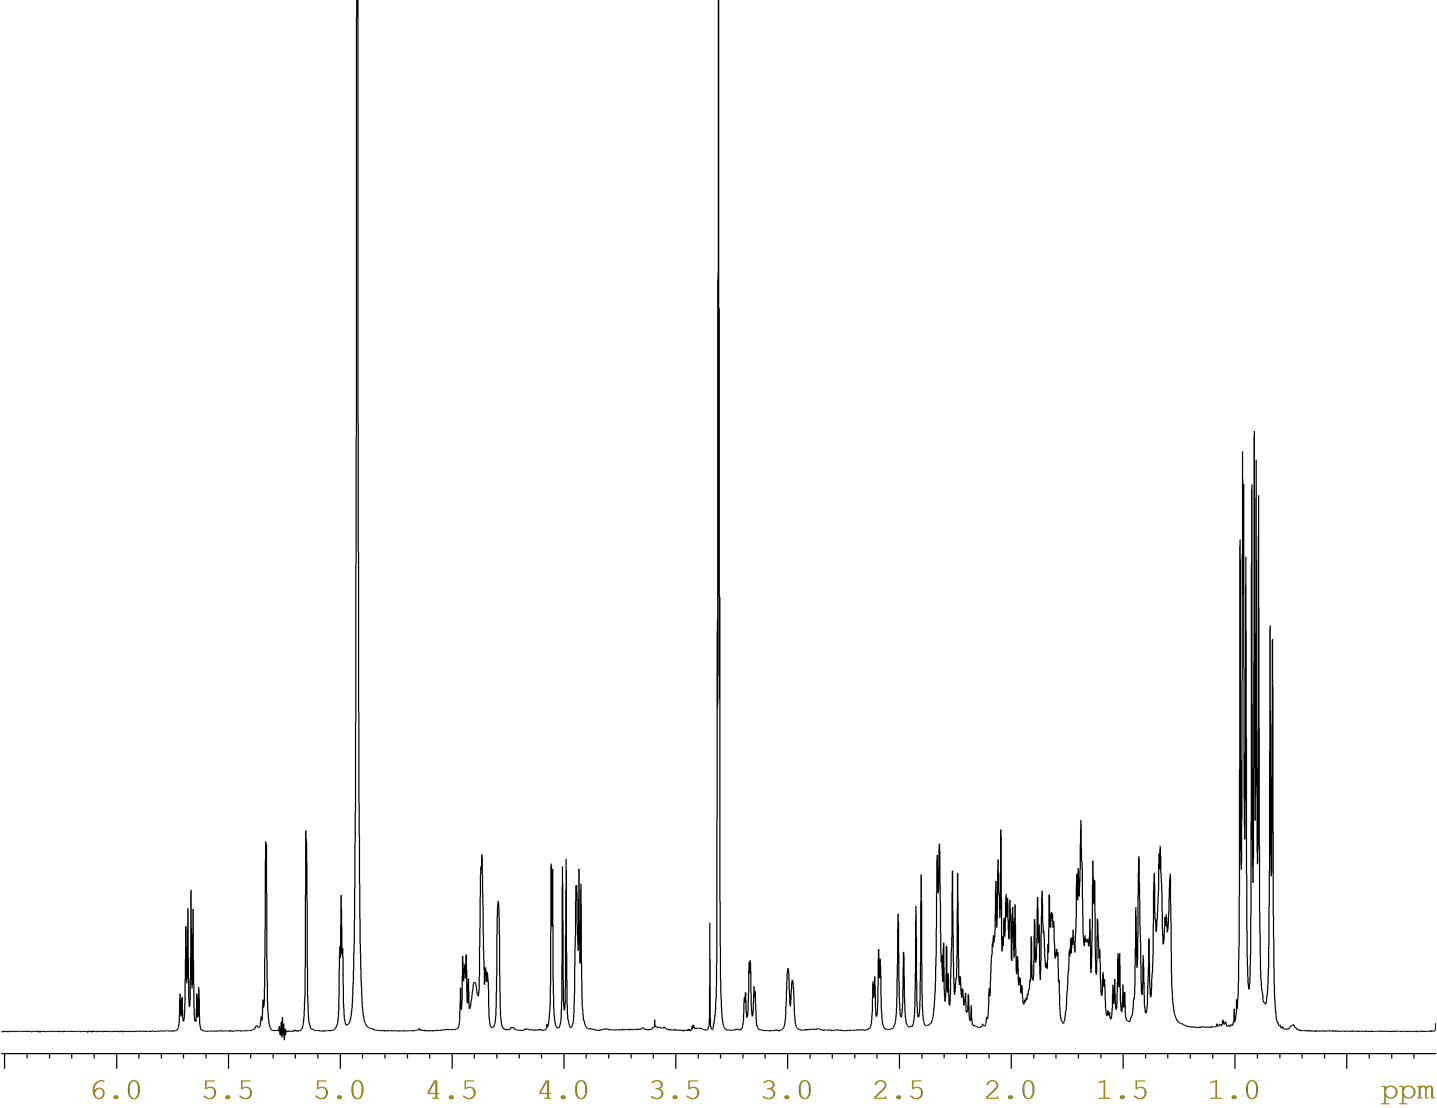


**Figure S6.** 1D 1H-NMR spectrum of AZA-37 (**2**) in CD3OD, 303 K, 600 MHz.


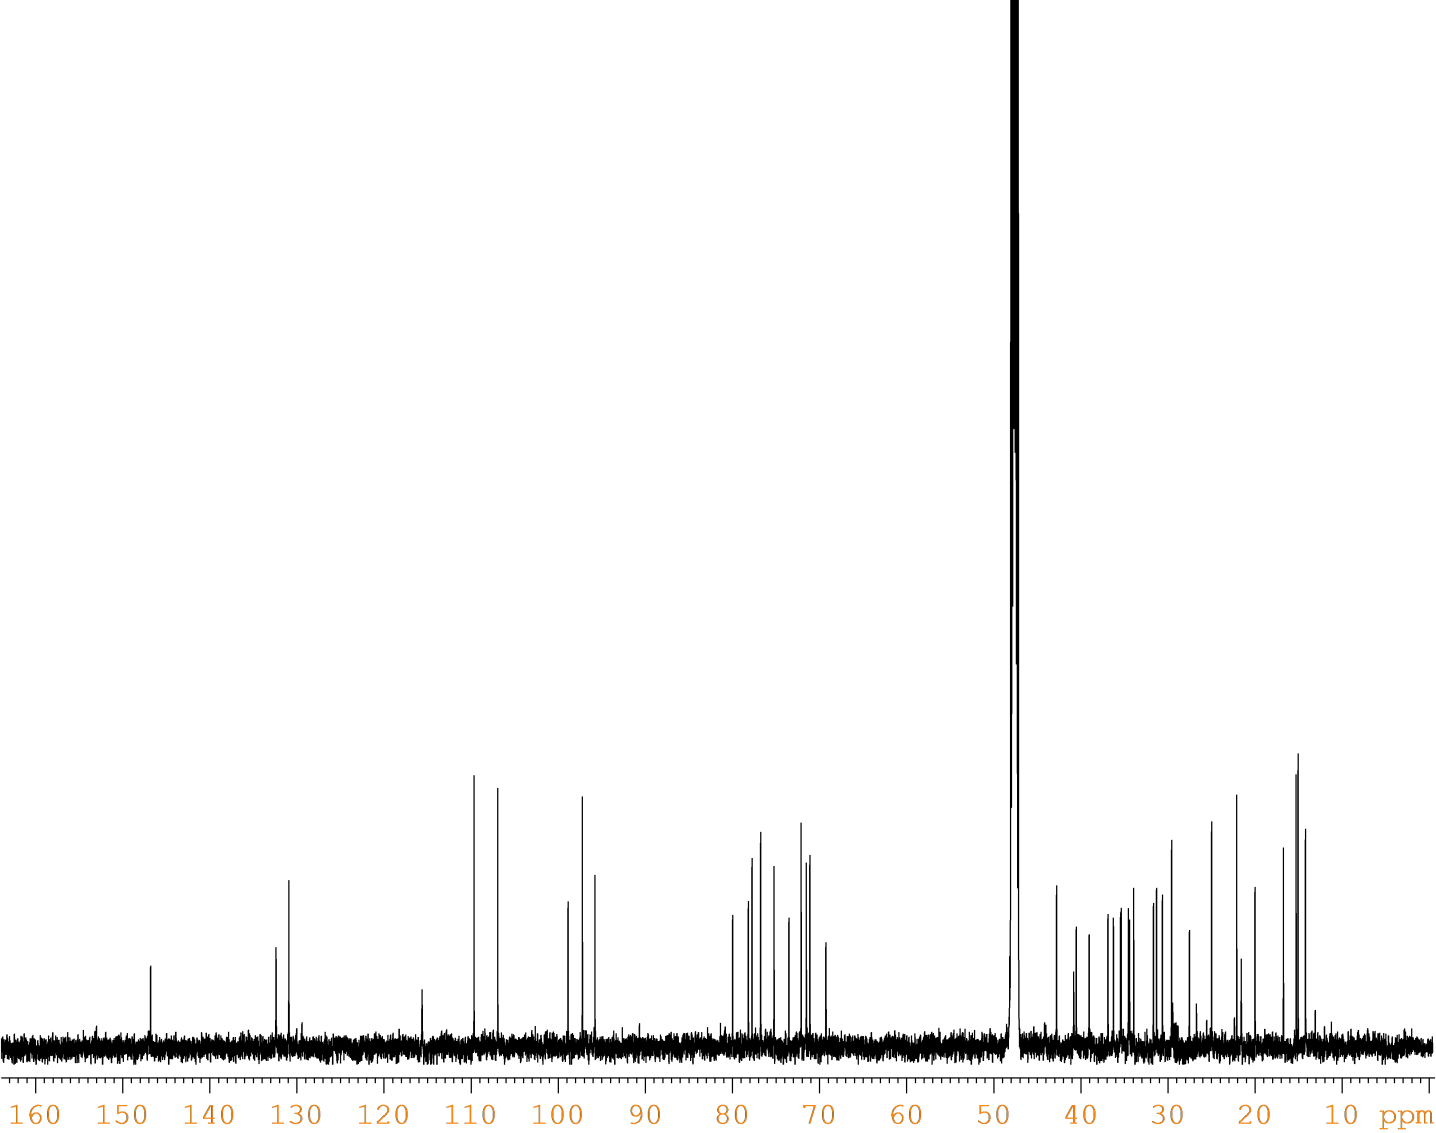


**Figure S7.** 1D 13C-NMR spectrum of AZA-37 (**2**) in CD3OD, 303 K, 150 MHz.


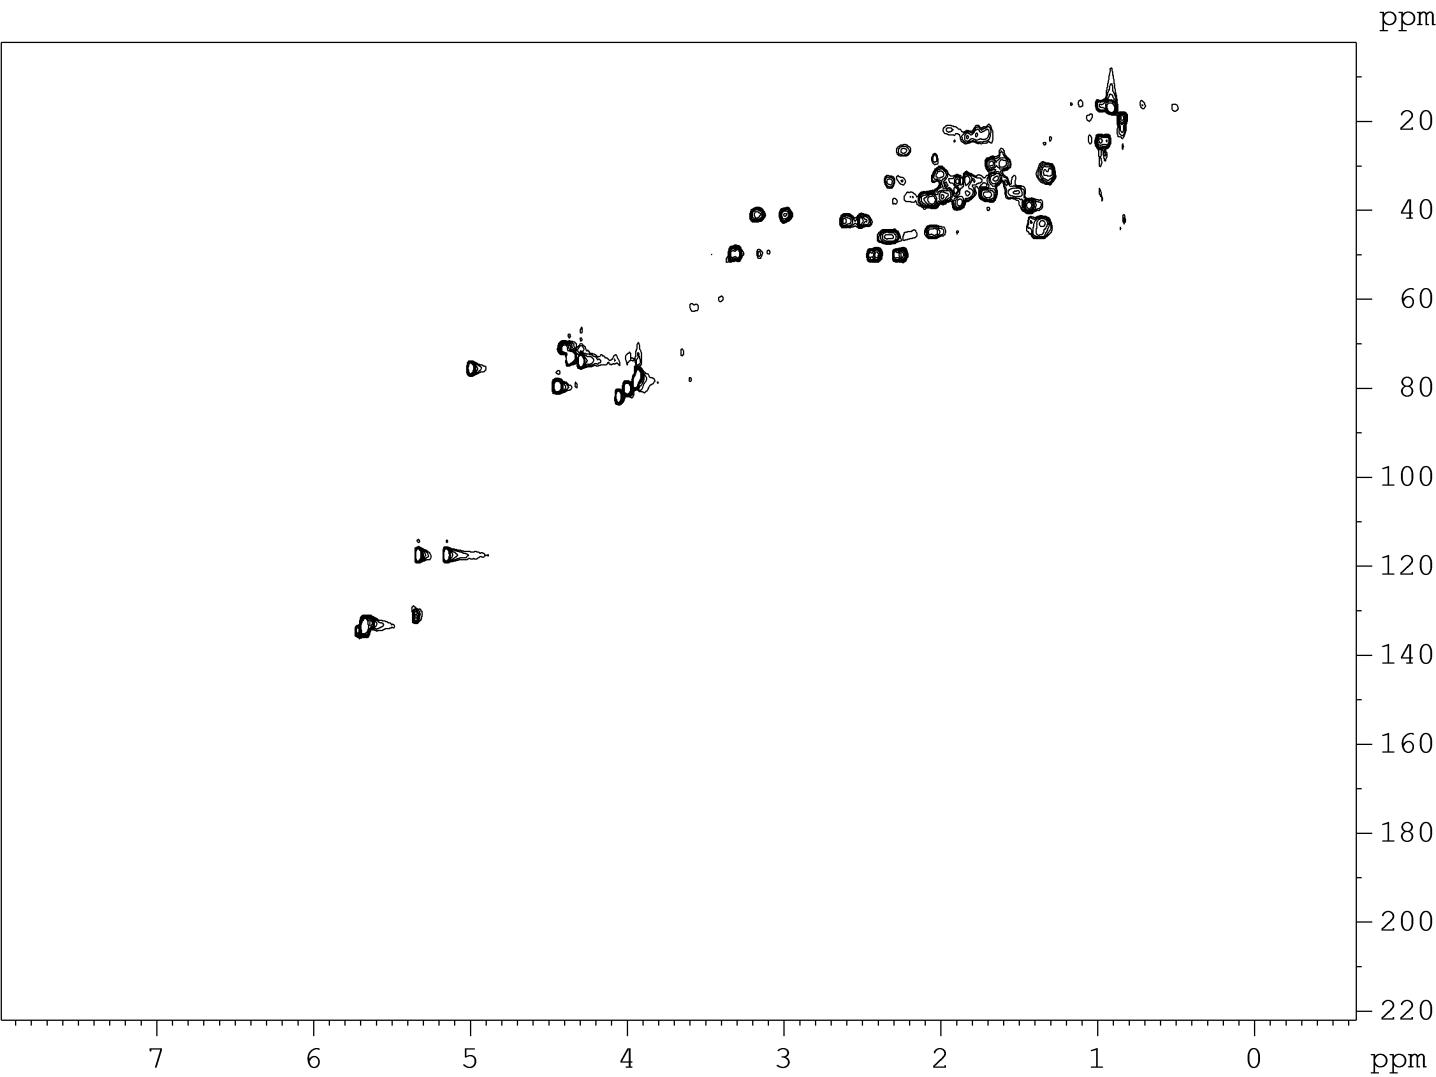


**Figure S8.** 2D1H,13C-HSQC spectrum of AZA-37 (**2**) in CD3OD, 303 K.


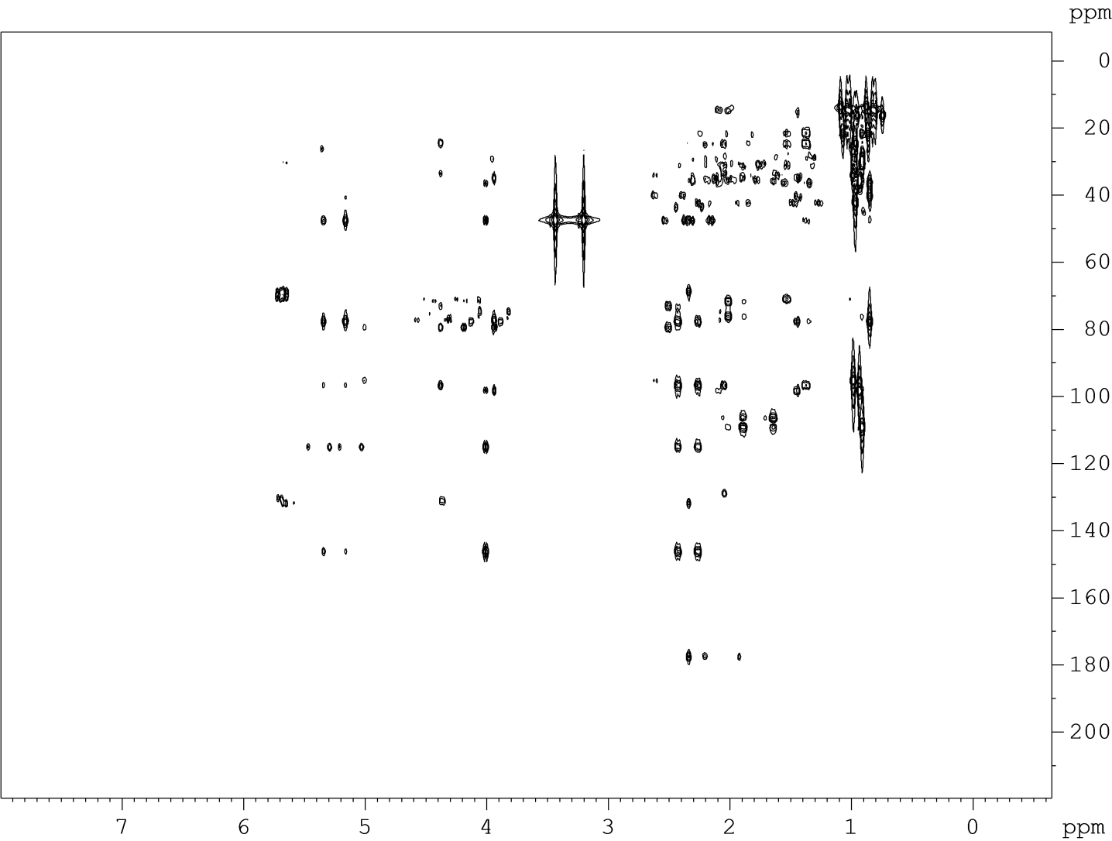


**Figure S9.** 2D1H,13C-HMBC spectrum of AZA-37 (**2**) in CD3OD, 303 K.


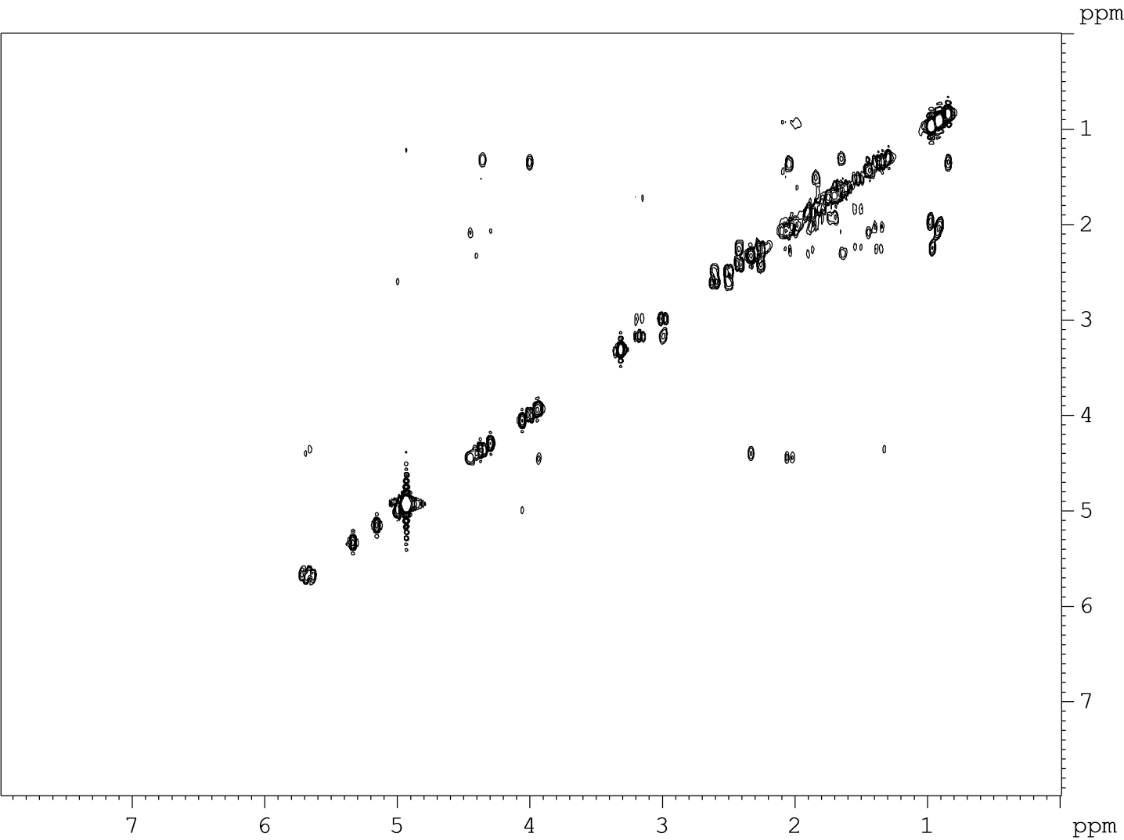


**Figure S10.** 2D1H,1H-COSY spectrum of AZA-37 (**2**) in CD3OD, 303 K.

© 2015 by the authors; licensee MDPI, Basel, Switzerland. This article is an open access article distributed under the terms and conditions of the Creative Commons Attribution license (http://creativecommons.org/licenses/by/4.0/).
